# Supplementary material for: Comparison of Macrophage Immune Responses and Metabolic Reprogramming in Smooth and Rough Variant Infections of Mycobacterium mucogenicum
Source: MDPI journal article supplement (doi:10.3390/ijms23052488), 2022-02-24
Supplement: s1 [file s1]

Supplemental table S1.

| Parameter Value                      | Equation                                                                                        |
|--------------------------------------|-------------------------------------------------------------------------------------------------|
| Non-mitochondrial oxygen consumption | Minimum rate measurement after R/A injection                                                    |
| Basal respiration                    | (Last rate measurement before first injection) - (Non-mitochondrial respiration rate)           |
| Maximum respiration                  | (Maximum rate measurement after FCCP injection) - (Non-mitochondrial respiration rate)          |
| H <sup>+</sup> (proton) leak         | (Minimum rate measurement after Oli injection) - (Non-mitochondrial respiration rate)           |
| ATP production                       | (Last rate measurement before first injection) - (Minimum rate measurement after Oli injection) |
| Spare respiratory capacity           | (Maximal respiration) - (Basal Respiration)                                                     |
| Glycolysis                           | (Maximum rate measurement before Oli injection)- (Last rate measurement before Glu injection)   |
| Glycolytic capacity                  | (Maximum rate measurement after Oli injection) - (Last rate measurement before Glu injection)   |
| Glycolytic reserve                   | (Glycolytic capacity) - (Glycolysis)                                                            |
| Non-glycolytic acidification         | Last rate measurement prior to glucose injection                                                |
| Glycolytic reserve as a %            | (Glycolytic capacity rate) / (Glycolysis) × 100                                                 |
